# Supplementary material for: Neural Correlates of Erotic Stimulation under Different Levels of Female Sexual Hormones
Source: PubMed Central journal article supplement (PMC3572100; doi:10.1371/journal.pone.0054447), 2013-02-13

**Supplementary Figure S1: Erotic video clip task**

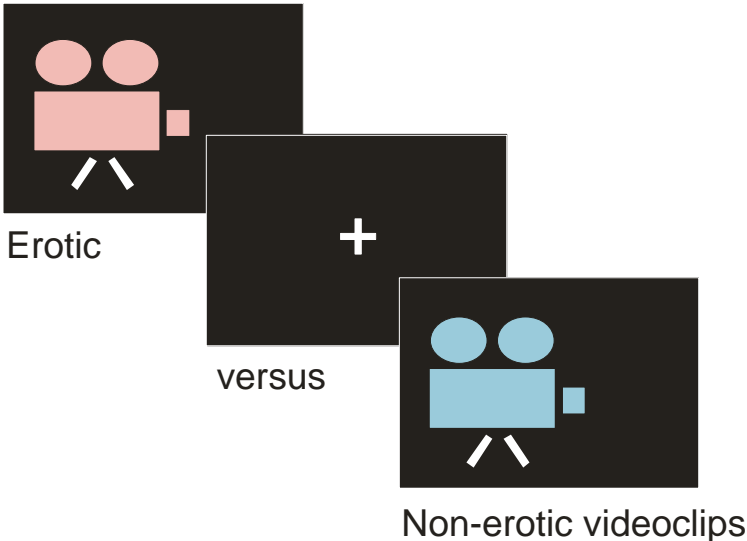

Supplement: pone.0054447.s001.pdf [file pone.0054447.s001.pdf]
