# Supplementary material for: Neural Correlates of Erotic Stimulation under Different Levels of Female Sexual Hormones
Source: PubMed Central journal article supplement (PMC3572100; doi:10.1371/journal.pone.0054447), 2013-02-13

Supplementary Figure S2: Erotic picture task

Expected Pictures

|                                              |                                                |
|----------------------------------------------|------------------------------------------------|
| <b>erotic</b><br>announced by downward arrow | <b>non-erotic</b><br>announced by upward arrow |
|----------------------------------------------|------------------------------------------------|

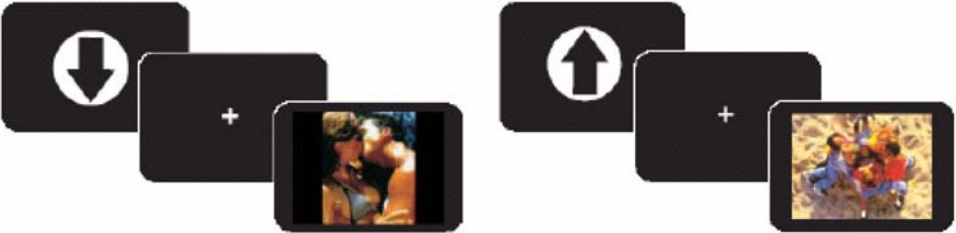

Unexpected Pictures

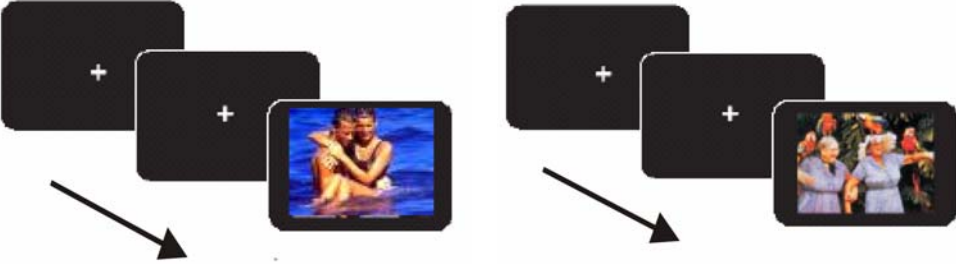

Supplement: pone.0054447.s002.pdf [file pone.0054447.s002.pdf]
