# Supplementary material for: Neural Correlates of Erotic Stimulation under Different Levels of Female Sexual Hormones
Source: PubMed Central journal article supplement (PMC3572100; doi:10.1371/journal.pone.0054447), 2013-02-13
Supplement: pone.0054447.s003.pdf [file pone.0054447.s003.pdf]

**Table S1: Main effects (whole brain analysis): Videos**

|                                                     | nC-F group |        |               | nC-L group |        |               | C group |        |               |
|-----------------------------------------------------|------------|--------|---------------|------------|--------|---------------|---------|--------|---------------|
|                                                     | t          | p      | Peak at x/y/z | t          | p      | Peak at x/y/z | t       | p      | Peak at x/y/z |
| <b>erotic minus non-erotic</b>                      |            |        |               |            |        |               |         |        |               |
| <b>Cortical structures</b>                          |            |        |               |            |        |               |         |        |               |
| Precentral gyrus, BA 6/44, l                        | 10.44      | <0.001 | -56/6/16      | 7.37       | <0.001 | -56/6/18~     | 6.74    | <0.001 | -54/6/22      |
| Precentral gyrus, BA 6/44, r                        | 7.30       | <0.001 | 52/4/12       | 5.40       | <0.001 | 48/2/14       | 6.92    | <0.001 | 48/6/24       |
|                                                     | 7.72       | <0.001 | 56/8/32       | 6.36       | <0.001 | 54/8/26~      | 8.59    | <0.001 | 54/4/34       |
| Insula, l                                           | 9.40       | <0.001 | -40/-2/10     | 6.78       | <0.001 | -36/-4/12~    | 9.81    | <0.001 | -38/-12/-6    |
| Insula, r                                           | 8.15       | <0.001 | 42/8/-8       | 7.00       | <0.001 | 40/6/-10~     | 9.86    | <0.001 | 38/-4/-12     |
| Anterior insula/inferior frontal gyrus, r           | 6.96       | <0.001 | 30/20/8       | 5.22       | <0.001 | 38/22/8       | 6.97    | <0.001 | 36/30/6       |
| Anterior insula/inferior frontal gyrus, l           | 7.36       | <0.001 | -34/22/8      | 5.75       | <0.001 | -30/16/12~    | 6.88    | <0.001 | -36/22/4      |
| Posterior middle cingulate                          | 7.01       | <0.001 | 2/14/28       | 4.21       | <0.001 | -4/18/30      | 7.42    | <0.001 | 2/10/28       |
| Posterior cingulate                                 | 7.64       | <0.001 | 6/-2/34       | 5.69       | <0.001 | 2/4/32~       | 7.00    | <0.001 | -4/-4/36      |
| DLPFC BA 9/46, l                                    | 6.49       | <0.001 | -46/38/18     | 4.18       | <0.001 | -36/40/28     | 7.07    | <0.001 | -44/36/12     |
| DLPFC BA 9/46, r                                    | 6.22       | <0.001 | 50/38/14      | 3.38       | <0.001 | 42/44/18      | 9.39    | <0.001 | 50/42/6       |
| Inferior parietal lobe, r                           | 11.57      | <0.001 | 60/-32/20     | 7.50       | <0.001 | 62/-30/22~    | 14.03   | <0.001 | 58/-32/20     |
| Inferior parietal lobe, l                           | 13.63      | <0.001 | -60/-34/28    | 10.91      | <0.001 | -60/-36/-28~  | 14.50   | <0.001 | -60/-34/28    |
| Fusiform gyrus/inferior temporal gyrus, BA 19/37, r | 8.44       | <0.001 | 46/-58/-12    | 7.00       | <0.001 | 46/-58/-10~   | 9.31    | <0.001 | 46/-58/-12    |
| Fusiform gyrus/inferior temporal gyrus, BA 19/37, l | 8.78       | <0.001 | -40/-68/-8    | 7.19       | <0.001 | -44/-70/-8~   | 8.76    | <0.001 | -40/-68/-8    |
| <b>Subcortical structures</b>                       |            |        |               |            |        |               |         |        |               |
| Thalamus, dorsomedian Nc, l                         | 6.23       | <0.001 | -6/-12/2      |            |        |               | 4.81    | <0.001 | -4/-12/0      |
| Thalamus, dorsomedian Nc, r                         | 6.01       | <0.001 | 8/-18/8       | 4.34       | <0.001 | 0/-14/8       | 5.46    | <0.001 | 8/-18/8       |
| Thalamus, ventrolateral Nc, r                       |            |        |               |            |        |               | 7.81    | <0.001 | 18/-12/12     |
| Nucleus accumbens, r                                | 4.92       | <0.001 | 14/4/-2       |            |        |               |         |        |               |
| Nucleus accumbens, l                                | 4.37       | <0.001 | -8/4/-4       |            |        |               |         |        |               |
| Brainstem/Tegmental area                            | 6.67       | <0.001 | -6/-28/-14    | 5.73       | <0.001 | 8/-22/-14~    | 6.30    | <0.001 | -8/-20/-12    |
| Hypothalamus, r                                     |            |        |               | 5.49       | <0.001 | 12/-4/-8      |         |        |               |
| Hypothalamus, l                                     |            |        |               |            |        |               | 4.92    | <0.001 | -6/-4/-6      |
| Substantia nigra/ subthalamic nucleus, l            | 6.59       | <0.001 | -14/-10/-8    | 6.09       | <0.001 | -16/-8/-8~    | 4.28    | <0.001 | -14/-8/-8     |
| Substantia nigra/ subthalamic nucleus, r            | 5.91       | <0.001 | 14/-10/-8     |            |        |               |         |        |               |
| Amygdala, r                                         |            |        |               |            |        |               | 6.21    | <0.001 | 22/-2/-14     |
| Amygdala, l                                         |            |        |               |            |        |               | 6.23    | <0.001 | -22/-4/-16    |
| <b>Cerebellum</b>                                   |            |        |               |            |        |               |         |        |               |
|                                                     | 9.19       | <0.001 | -26/-70/-26   | 5.81       | <0.001 | -28/-70/-26~  | 7.45    | <0.001 | -30/-60/-26   |
|                                                     | 7.73       | <0.001 | -28/-62/-28   |            |        |               |         |        |               |
|                                                     | 7.67       | <0.001 | 24/-66/-28    | 5.83       | <0.001 | 26/-66/-28~   | 4.87    | <0.001 | 24/-66/-26    |

All activations in Supplemental Table 1 survived FDR corrections at  $p < 0.05$ ; all activations in the nC-F and C group and those marked with “~” in the nC-L group survived FWE corrections at  $p < 0.05$ .

nC-group: women not taking hormonal contraceptives; F: mid-follicular phase of hormonal cycle; L: mid-luteal phase of menstrual cycle; C-group: women taking hormonal contraceptives; r: right; l: left

No significant interactions for nC-F > nC-L

T: t-value; NV: number of contiguously significant voxels; peak coordinates of clusters are MNI (Montreal Neurological Institute) normalized stereotactic coordinates: -x: left from the anterior commissure (AC); -y: posterior from AC; -z: inferior from AC. DLPFC: dorsolateral prefrontal cortex; (D)MPFC: (dorsal) medial prefrontal cortex; BA: Brodman area; Nc: Nucleus

Activations with a minimum number of voxels of at least 10 are reported down to a significance threshold of  $p < 0.005$ . We chose this more lenient threshold because we wanted to ascertain that functional activations in any of the groups were not masked out by a too conservative thresholding.
