# Supplementary material for: Neural Correlates of Erotic Stimulation under Different Levels of Female Sexual Hormones
Source: PubMed Central journal article supplement (PMC3572100; doi:10.1371/journal.pone.0054447), 2013-02-13
Supplement: pone.0054447.s004.pdf [file pone.0054447.s004.pdf]

**Table S2: Main effects (whole brain analysis): Pictures**

|                                                     | nC-F group |        |               | nC-L group |        |               | C group |        |               |
|-----------------------------------------------------|------------|--------|---------------|------------|--------|---------------|---------|--------|---------------|
|                                                     | t          | p      | Peak at x/y/z | t          | p      | Peak at x/y/z | t       | p      | Peak at x/y/z |
| <b>erotic minus non-erotic</b>                      |            |        |               |            |        |               |         |        |               |
| <b>Cortical structures</b>                          |            |        |               |            |        |               |         |        |               |
| Precentral gyrus, BA 6/44, l                        | 4.13       | <0.001 | -46/0/28      | 3.56       | =0.001 | -54/6/26      | 3.47    | =0.001 | -46/0/28      |
| Precentral gyrus, BA 6/44, r                        | 4.09       | <0.001 | 42/8/22       | 4.17       | <0.001 | 50/12/28      | 5.38    | <0.001 | 44/6/28       |
|                                                     |            |        |               |            |        |               | 5.51    | <0.001 | 48/16/24      |
| Insula, r                                           | 3.44       | =0.001 | 42/12/-8      |            |        |               |         |        |               |
| Anterior insula/inferior frontal gyrus, r           | 5.38       | <0.001 | 40/26/-16     | 4.53       | <0.001 | 38/30/8       | 4.54    | <0.001 | 34/18/-8      |
|                                                     |            |        |               |            |        |               |         |        |               |
| Anterior insula/inferior frontal gyrus, l           | 3.20       | =0.002 | 36/32/4       |            |        |               | 4.77    | <0.001 | -32/20/8      |
|                                                     | 3.39       | =0.001 | -24/32/-12    |            |        |               |         |        |               |
|                                                     | 4.07       | <0.001 | -30/24/12     |            |        |               |         |        |               |
| Subgenual cingulate                                 | 5.95       | <0.001 | 4/30/-12~     | 4.16       | <0.001 | 4/34/-10      | 4.58    | <0.001 | 2/30/-10      |
| Pregenual cingulate                                 | 4.92       | <0.001 | -6/36/4       | 5.88       | <0.001 | -2/38/12      | 3.94    | <0.001 | 2/32/6        |
| Anterior middle cingulate                           | 4.16       | <0.001 | -6/24/22      | 4.07       | <0.001 | -4/26/24      | 3.84    | <0.001 | 0/28/16       |
| Posterior middle cingulate                          | 3.98       | <0.001 | 0/12/38       |            |        |               | 4.64    | <0.001 | 2/14/34       |
| Posterior cingulate                                 | 4.58       | <0.001 | -10/-46/18    |            |        |               | 4.10    | <0.001 | 2/-10/34      |
|                                                     | 3.45       | =0.001 | 4/-18/34      |            |        |               |         |        |               |
|                                                     | 3.27       | =0.002 | 2/-2/32       |            |        |               |         |        |               |
| DMPFC, BA 9                                         | 3.31       | =0.002 | 4/50/38       |            |        |               | 3.96    | <0.001 | 16/48/34      |
| MPFC, BA 9                                          | 3.90       | <0.001 | -2/54/-2      | 4.52       | <0.001 | 0/56/0        | 3.78    | =0.001 | 6/50/12       |
| DLPFC BA 9/46, r                                    |            |        |               |            |        |               | 5.33    | <0.001 | 52/40/2       |
| Inferior parietal lobe, l                           | 5.60       | <0.001 | -46/-70/18    |            |        |               |         |        |               |
| Postcentral gyrus, l                                | 4.86       | <0.001 | -56/-22/34    | 9.51       | <0.001 | -56/-24/34~   | 5.06    | <0.001 | -54/-24/34    |
| Postcentral gyrus, r                                |            |        |               | 4.88       | <0.001 | 60/-20/34     | 4.44    | <0.001 | 58/-22/34     |
| Fusiform gyrus inferior temporal gyrus, BA 19/37, r | 6.64       | <0.001 | 48/-70/-12~   | 7.31       | <0.001 | 44/-76/0~     | 6.93    | <0.001 | 38/-66/-6~    |
| Fusiform gyrus inferior temporal gyrus, BA 19/37, l | 6.40       | <0.001 | -48/-64/2~    | 7.71       | <0.001 | -52/-68/-6~   | 6.44    | <0.001 | -50/-64/2~    |
| <b>Subcortical structures</b>                       |            |        |               |            |        |               |         |        |               |
| Thalamus, dorsomedian Nc, l                         | 3.24       | =0.002 | -2/-6/8       | 3.50       | <0.001 | -2/-14/4      |         |        |               |
| Thalamus, dorsomedian Nc, r                         | 3.42       | =0.001 | 4/-16/12      |            |        |               | 4.06    | <0.001 | 4/-16/14      |
| Thalamus, ventrolateral Nc, r                       |            |        |               |            |        |               |         |        |               |
| Nucleus accumbens, r                                | 3.28       | =0.002 | 8/14/-6       | 5.82       | <0.001 | 8/16/-4~      | 4.51    | <0.001 | 4/2/-2        |
| Nucleus accumbens, l                                | 2.84       | =0.004 | -6/8/-6       | 5.11       | <0.001 | -8/16/-4      | 3.76    | <0.001 | -10/6/-6      |
| Brainstem/Tegmental area                            | 3.64       | =0.001 | 6/-26/-18     | 6.61       | <0.001 | 8/-24/-20     | 3.84    | <0.001 | 8/-20/-10     |
| Hypothalamus, r                                     | 4.61       | <0.001 | 6/-8/-6       | 6.19       | <0.001 | 6/-6/-6       | 4.28    | <0.001 | 8/-4/-4       |
| Hypothalamus, l                                     | 4.50       | <0.001 | -8/-8/-12     | 6.11       | <0.001 | -8/-8/-12     | 4.56    | <0.001 | -6/-6/-2      |
|                                                     |            |        |               |            |        |               | 4.34    | <0.001 | -8/-8/-12     |
| Substantia nigra/ subthalamic nucleus, l            |            |        |               | 4.06       | <0.001 | -12/-18/-12   |         |        |               |
| Substantia nigra/ subthalamic nucleus, r            | 5.46       | <0.001 | 16/-16/-12    | 3.78       | <0.001 | 16/-18/-12    | 3.82    | <0.001 | 14/-16/-12    |
| Amygdala, r                                         |            |        |               |            |        |               | 3.12    | =0.001 | 22/-6/-14     |
| Amygdala, l                                         | 3.73       | =0.001 | -24/-4/-18    |            |        |               | 3.28    | =0.002 | -24/-6/-16    |
| <b>Cerebellum</b>                                   |            |        |               |            |        |               |         |        |               |
|                                                     | 6.81       | <0.001 | -42/-56/-22   | 4.62       | <0.001 | -26/-62/-34   | 5.83    | <0.001 | -12/-76/-36   |
|                                                     | 4.22       | <0.001 | -34/-78/-38   | 4.74       | <0.001 | 46/-54/-34    |         |        |               |
|                                                     | 3.83       | <0.001 | -10/-76/-38   | 3.70       | =0.001 | 20/-70/-26    |         |        |               |

All activations in Supplemental Table 2 survived FDR corrections at  $p < 0.05$ , activations marked with “~” survived also FWE corrections at  $p < 0.05$ .

nC-group: women not taking hormonal contraceptives; F: mid-follicular phase of hormonal cycle; L: mid-luteal phase of menstrual cycle; C-group: women taking hormonal contraceptives; r: right; l: left  
No significant interactions for nC-F > nC-L

T: t-value; NV: number of contiguously significant voxels; peak coordinates of clusters are MNI (Montreal Neurological Institute) normalized stereotactic coordinates: -x: left from the anterior commissure (AC); -y: posterior from AC; -z: inferior from AC. DLPFC: dorsolateral prefrontal cortex; (D)MPFC: (dorsal) medial prefrontal cortex; BA: Brodman area; Nc: Nucleus  
Activations with a minimum number of voxels of at least 10 are reported down to a significance threshold of  $p < 0.005$ . We chose this more lenient threshold because we wanted to ascertain that functional activations especially in the C group were not masked out by a too conservative thresholding.
