# Supplementary material for: Neural Correlates of Erotic Stimulation under Different Levels of Female Sexual Hormones
Source: PubMed Central journal article supplement (PMC3572100; doi:10.1371/journal.pone.0054447), 2013-02-13
Supplement: pone.0054447.s005.pdf [file pone.0054447.s005.pdf]

**Table S3: Main effects (whole brain analysis): Expectation of pictures**

|                                           | nC-F group |        |               | nC-L group |        |               | C group |   |               |
|-------------------------------------------|------------|--------|---------------|------------|--------|---------------|---------|---|---------------|
|                                           | t          | p      | Peak at x/y/z | t          | p      | Peak at x/y/z | t       | p | Peak at x/y/z |
| <b>erotic minus non-erotic</b>            |            |        |               |            |        |               |         |   |               |
| <b><u>Cortical structures</u></b>         |            |        |               |            |        |               |         |   |               |
| Precentral gyrus, BA 6/44, r              | 3.24       | =0.001 | 44/16/12      |            |        |               |         |   |               |
| Precentral gyrus, BA 6/44, l              | 4.40       | <0.001 | -46/-2/16     |            |        |               |         |   |               |
| Anterior insula/inferior frontal gyrus, l | 3.54       | <0.001 | -28/26/-2     |            |        |               |         |   |               |
| Pregenua anterior cingulate               |            |        |               | 3.35       | =0.001 | 12/34/-6      |         |   |               |
| Anterior middle cingulate                 |            |        |               | 3.27       | =0.001 | -16/38/18     |         |   |               |
| Posterior middle cingulate                |            |        |               | 3.27       | =0.001 | -16/18/28     |         |   |               |
| Posterior cingulate                       |            |        |               | 3.79       | <0.001 | 4/-40/16      |         |   |               |
| DMPFC BA 9                                | 4.25       | <0.001 | 8/48/30       | 3.53       | <0.001 | 12/44/38      |         |   |               |
| DLPFC, BA 9/46                            |            |        |               | 2.98       | =0.002 | 32/34/24      |         |   |               |
| MPFC BA 9                                 |            |        |               | 3.14       | =0.002 | 10/52/14      |         |   |               |
| Inferior frontal gyrus, BA 11             |            |        |               | 3.10       | =0.002 | -22/42/-8     |         |   |               |
| <b><u>Subcortical structures</u></b>      |            |        |               |            |        |               |         |   |               |
| Thalamus, dorsomedian Nc                  | 4.15       | <0.001 | 0/-10/0       |            |        |               |         |   |               |
| Dorsal brainstem                          | 3.27       | =0.001 | 8/-26/-10     |            |        |               |         |   |               |
| <b><u>Cerebellum</u></b>                  |            |        |               |            |        |               |         |   |               |
|                                           | 4.12       | <0.001 | 14/-78/-3     | 3.42       | =0.001 | -16/-82/-38   |         |   |               |
|                                           | 4.12       | <0.001 | -18/-46/-30   | 3.27       | =0.001 | -38/-64/-36   |         |   |               |

nC-group: women not taking hormonal contraceptives; F: mid-follicular phase of hormonal cycle; L: mid-luteal phase of menstrual cycle; C-group: women taking hormonal contraceptives; r: right; l: left

No significant interactions for nC-F > nC-L

T: t-value; NV: number of contiguously significant voxels; peak coordinates of clusters are MNI (Montreal Neurological Institute) normalized stereotactic coordinates: -x: left from the anterior commissure (AC); -y: posterior from AC; -z: inferior from AC. DLPFC: dorsolateral prefrontal cortex; (D)MPFC: (dorsal) medial prefrontal cortex; BA: Brodman area; Nc: Nucleus

Activations with a minimum number of voxels of at least 10 are reported down to a significance threshold of  $p < 0.005$ . We chose this more lenient threshold because we wanted to ascertain that functional activations especially in the C group were not masked out by a too conservative thresholding.
